# Supplementary material for: Simple and rational design of a polymer nano-platform for high performance of HCV related miR-122 reduction in the liver
Source: Royal Society of Chemistry journal article supplement (doi:10.1039/c8bm00639c), 2018-01-01
Supplement: c8bm00639c1.pdf [file c8bm00639c1.pdf]

**Supporting information for:**

**Simple and rational design of polymer nano-platform for  
high performance of HCV related miR-122 reduction in  
liver**

*Hao Fu <sup>†</sup>, XiangYu Zhang<sup>†</sup>, Qi Wang<sup>‡</sup>, Yin Sun<sup>†</sup>, Lei Liu<sup>†</sup>, LiLi Huang<sup>†</sup>, Li Ding<sup>†</sup>,  
Ming Shen<sup>†</sup>, Lin Zhang<sup>\*,§</sup>, Yourong Duan<sup>\*,†</sup>*

<sup>†</sup>State Key Laboratory of Oncogenes and Related Genes, Renji Hospital, School of Biomedical Engineering, Shanghai Jiao Tong University

<sup>‡</sup>Key Laboratory for Advanced Materials and Institute of Fine Chemicals, Shanghai Key Laboratory of Functional Materials Chemistry, School of Chemistry and Molecular Engineering, East China University of Science and Technology

<sup>§</sup>Beijing Tsinghua Changgung Hospital, School of Clinical Medicine, Tsinghua University

**\*Corresponding authors:**

You-Rong Duan

State Key Laboratory of Oncogenes and Related Genes, Shanghai Cancer Institute, Renji Hospital, School of Medicine, Shanghai Jiao Tong University, Shanghai 200032 (P. R. China)

E-mail: yrduan@shsci.org

Lin Zhang,

Beijing Tsinghua Changgung Hospital, School of Clinical Medicine, Tsinghua University, No. 168 Litang Road, Changping District, Beijing 102218 (P. R. China)

E-mail: zla02285@btch.edu.cn

## Supplementary Figures:

**Table S1.** AN-loaded mPEG-b-PLGA-b-PLL nanoparticle formulations and properties

| Formulation        | antimiR<br>in feed<br>(nmol) | EE (%) | DL (%) | Size(nm) | PDI   | Zeta<br>potential(mV) |
|--------------------|------------------------------|--------|--------|----------|-------|-----------------------|
| NP <sub>2.5</sub>  | 2.5                          | > 90   | 0.213  | 118.5    | 0.204 | +22                   |
| NP <sub>5.0</sub>  | 5                            | > 85   | 0.426  | 136.2    | 0.241 | -5.4                  |
| NP <sub>10.0</sub> | 10                           | > 80   | 0.851  | 155.7    | 0.268 | -12                   |

**Table S2.** IN-loaded mPEG-b-PLGA-b-PLL nanoparticle formulations and properties

| Formulation        | antimiR<br>in feed<br>(nmol) | EE (%) | DL (%) | Size(nm) | PDI   | Zeta<br>potential(mV) |
|--------------------|------------------------------|--------|--------|----------|-------|-----------------------|
| NP <sub>2.5</sub>  | 2.5                          | > 90   | 0.204  | 120.9    | 0.192 | +24                   |
| NP <sub>5.0</sub>  | 5                            | > 80   | 0.417  | 140.6    | 0.217 | -4.2                  |
| NP <sub>10.0</sub> | 10                           | > 80   | 0.824  | 153.1    | 0.253 | -10.5                 |

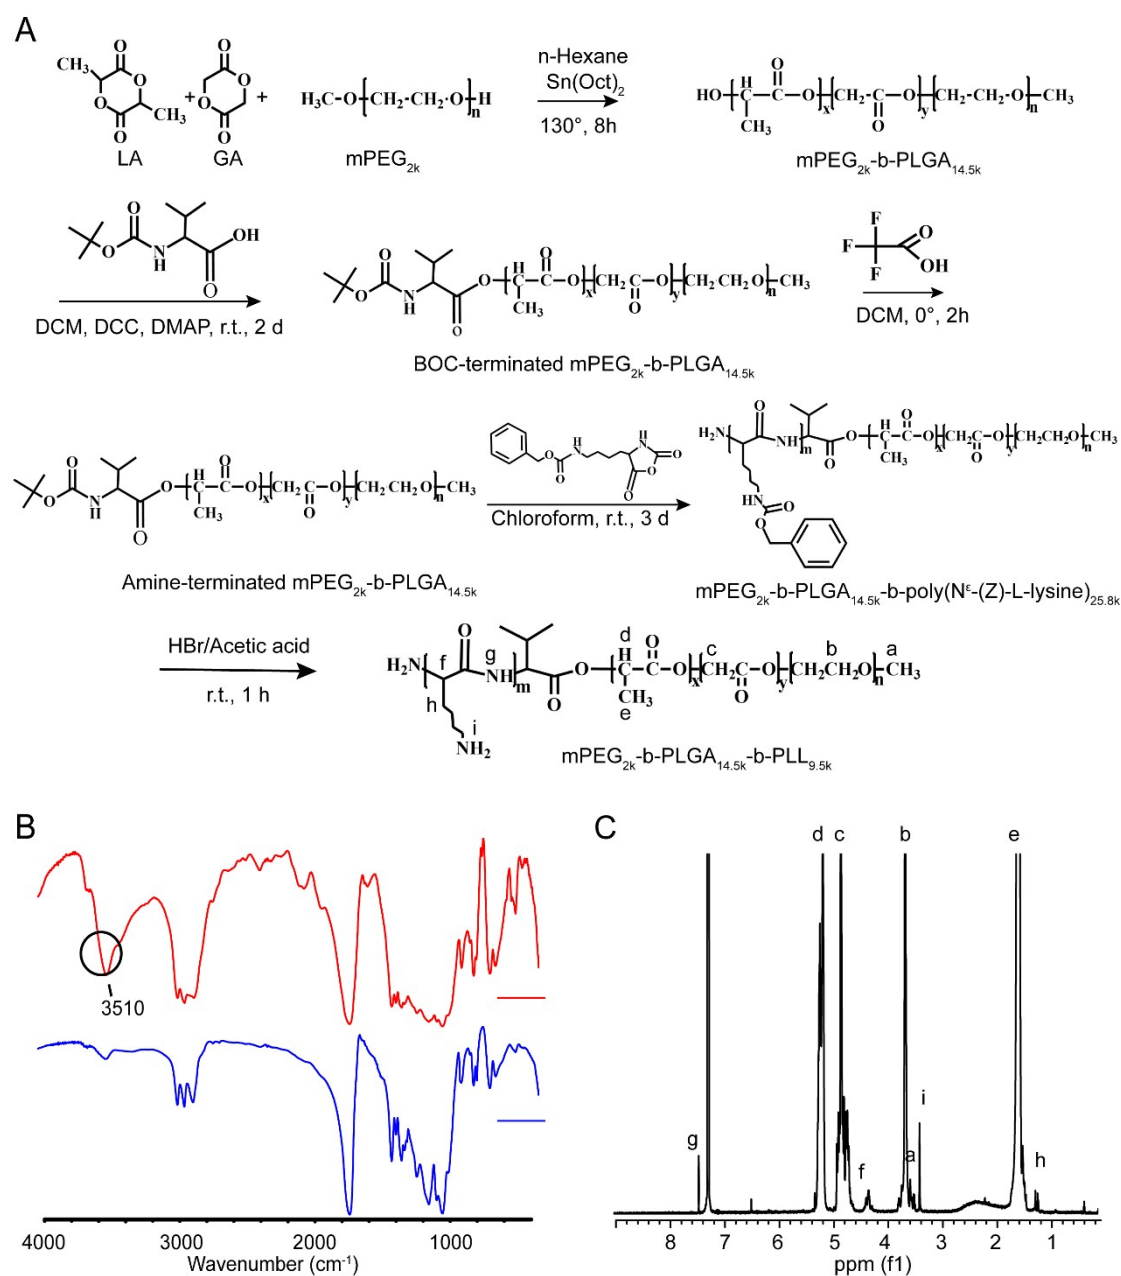

**Fig. S1** Synthesis of mPEG-PLGA-b-PLL block copolymer and characteristics of mPEG-PLGA-b-PLL block copolymer (A). FTIR spectrum of mPEG-PLGA (Red), mPEG-PLGA-b-PLL (Blue) (B). The absorption peak at 3510  $\text{cm}^{-1}$  was attributed to the -NH- stretch vibration, indicating the mPEG-PLGA-b-PLL was synthesized.  $^1\text{H}$  NMR spectrum of mPEG-PLGA-b-PLL block copolymer (C). The peaks at 4.36 ppm (f, -CH-), 3.38 ppm (i, -CH<sub>2</sub>-) and 1.35 ppm (h, -CH<sub>2</sub>-) were attributed to protons of the lysine segment. The peaks at 7.87 (g, -NH-) ppm were assigned to protons of the amino group of the lysine group (C).

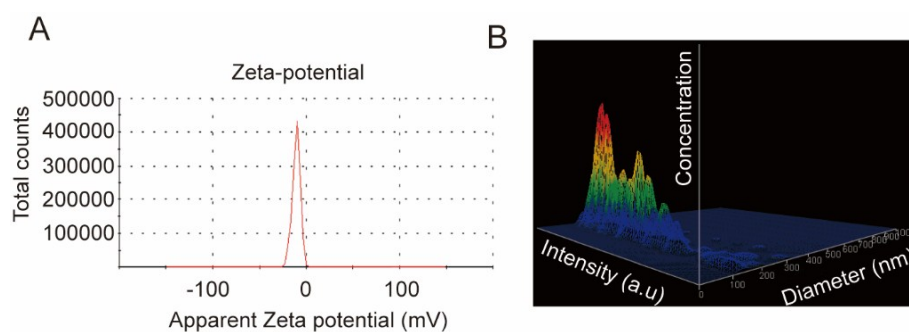

**Fig. S2** Characteristics of NPs. (A) The Zeta-potential of NP-AN was -12 mV. (B) The size distribution results of Nanosight showed similar sizes in the distribution results.

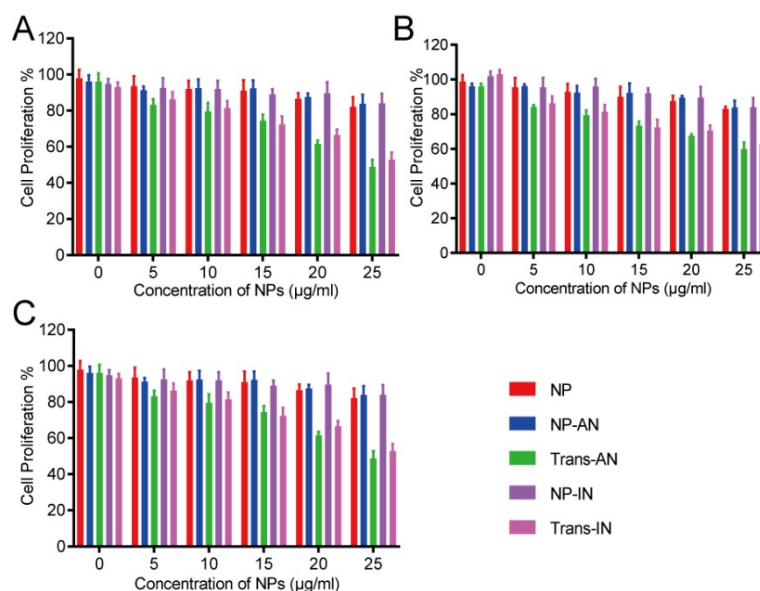

**Fig. S3** (A), (B), (C) MTT results of NPs for 24, 48 and 72 h. The viability of cells incubated with anti-miRs-loaded NPs were all above 80%, which showed nearly no toxicity to LO2 cells. Data are presented as the means  $\pm$  SD. (n=3). NP, NP-AN, Trans-AN, NP-IN and Trans-IN means injected with empty nanoparticles, antagomir-loaded nanoparticles, transfection agent with antagomir-122, inhibitor-loaded nanoparticles and transfection agent with inhibitor-122.

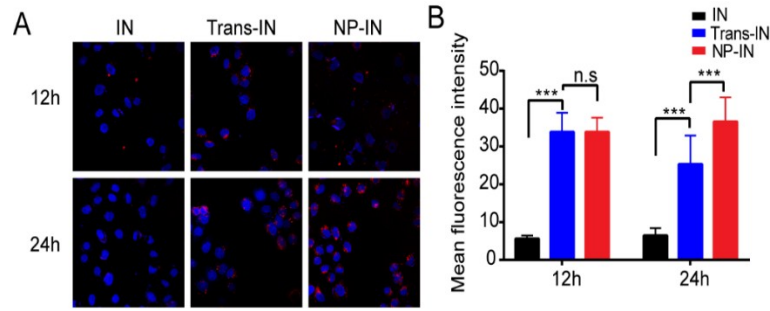

**Fig. S4** Cellular uptake of NPs and lysosome escape of NPs. (A) LO2 cells treated with different IN, transfection agent with IN and NP-IN for 12 and 24h. (B) Quantitative results of cellular uptake of A, which further qualified the results from A.

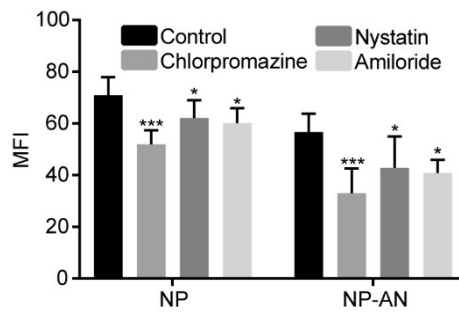

**Fig. S5** Investigation of internalization pathways of NP and NP-AN.

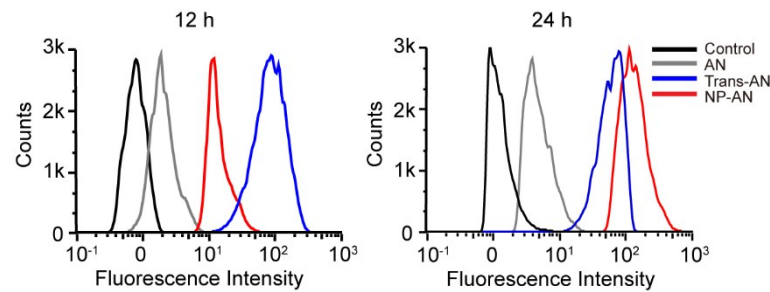

**Fig. S6** Cellular uptake results measured by flowcytometry of NP-AN. The result was consist with the result at (A). (D) showed that NPs were trapped at lysosome at 4 h, as the red and green fluorecence were overlaid together.

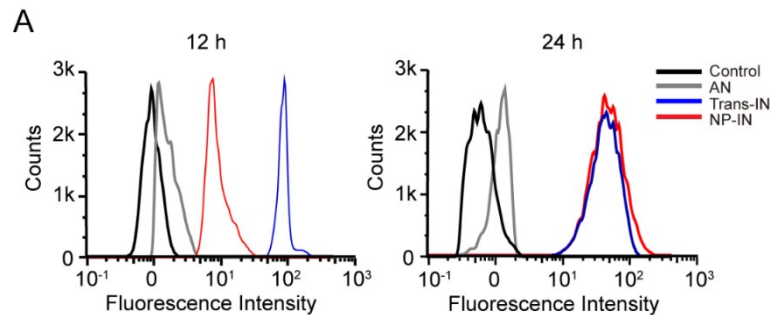

**Fig. S7** Cellular uptake results measured by flowcytometry . (A) LO2 cells treated with IN with/without NPs and transfection agent for 12h. (B) LO2 cells treated with inhibitor with/without NPs and transfection agent for 24h.

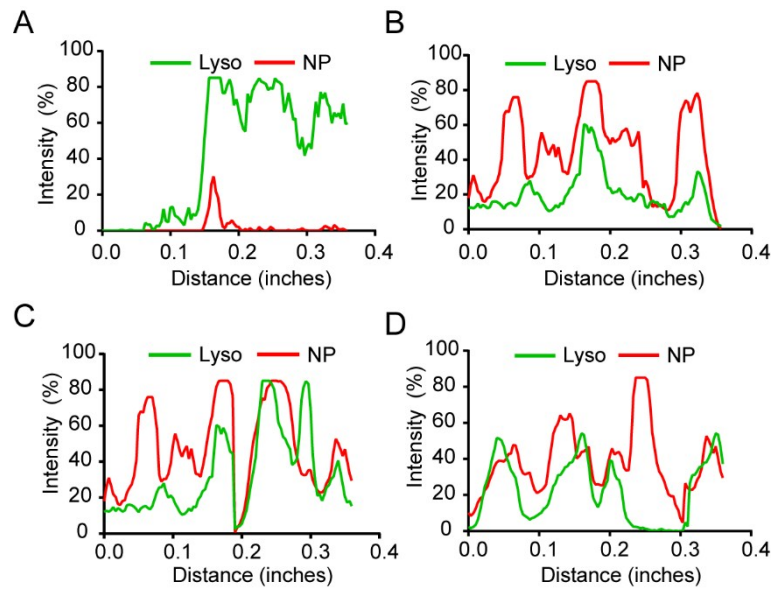

**Fig. S8** Lysosome escape was performed at 8 and 12 h, while the green and red fluorescence began to depart after 1 h (A), 8 h (B), 12 h (C) and 24 h (D).

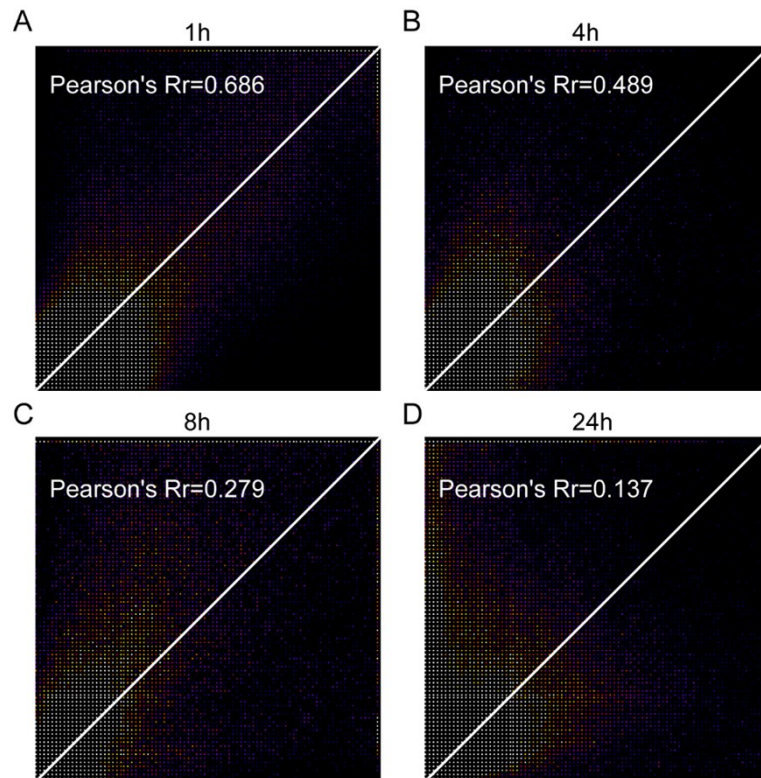

**Fig. S9** Scatter plot of Figure 2D. (A) Scatter plot calculated from Figure 2D merged picture of 1h; (B) Scatter plot calculated from Figure 2D merged picture of 4h; (C) Scatter plot calculated from Figure 2D merged picture of 8h; (D) Scatter plot calculated from Figure 2D merged picture of 24h.

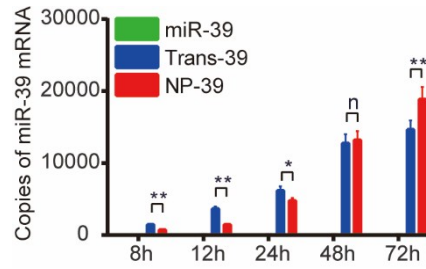

**Fig. S10** Exogenous microRNA transfection in vitro. LO2 cells treated with miR-39 mimic (miR-39), transfection agent with miR-39 mimic (Trans-39) and miR-39 mimic loaded NPs (NP-39).

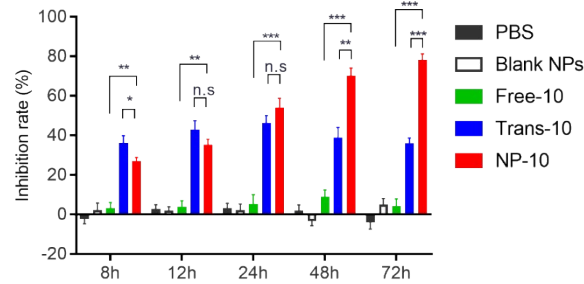

**Fig. S11** LO2 cells treated with inhibitor (IN), transfection agent with IN and IN loaded NPs (NP-IN), miR-122 inhibition were measured.

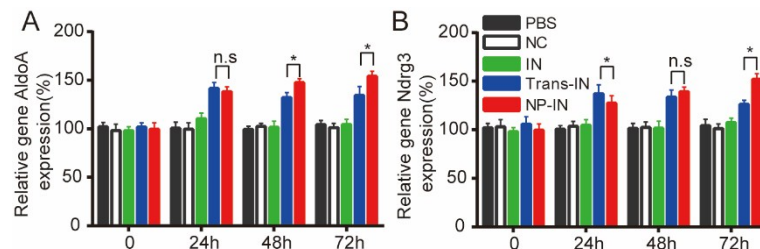

**Fig. S12** LO2 cells treated with inhibitor (IN), transfection agent with IN and IN loaded NPs (NP-IN), Aldoa and Ndr3 expression were measured. (A) Relative Aldoa expression after incubation. (B) Relative Ndr3 expression after incubation.

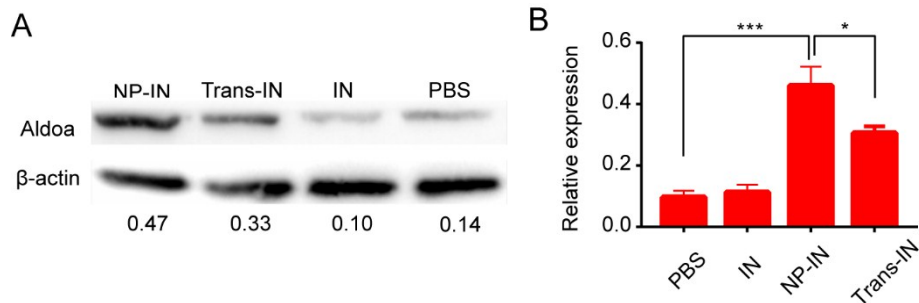

**Fig. S13** (A) The Aldoa protein expression after different treatments. Aldoa protein level increased dramatically within 3 weeks after administrated with NP-IN. (B) Quantitative results of A

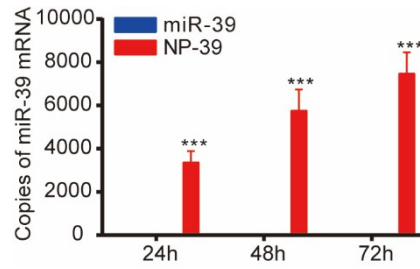

**Fig. S14** Exogenous microRNA transfection *in vivo*. Balb/c mice injected with miR-39 mimic (miR-39), transfection agent with miR-39 mimic (Trans-39) and miR-39 mimic loaded NPs (NP-39).

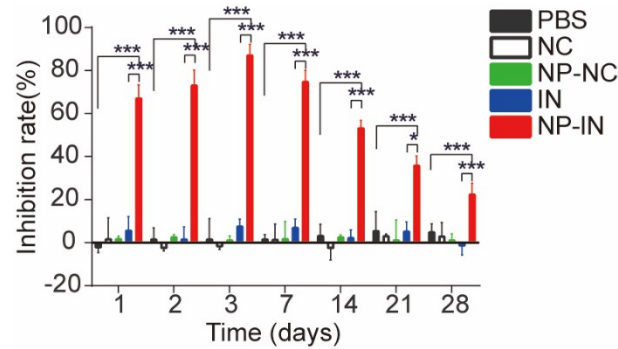

**Fig. S15** Mice treated with different naked IN, transfection agent and NP-IN, miR-122 inhibition were measured.

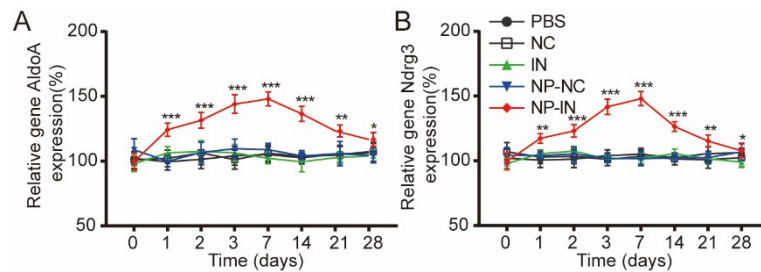

**Fig. S16** *In vivo* miR-122 knockdown efficiency and relative gene expression after injected with NP-IN. (A) The Aldoa gene expression after injected with NP-IN. (B) The Aldoa gene expression after injected with NP-IN.

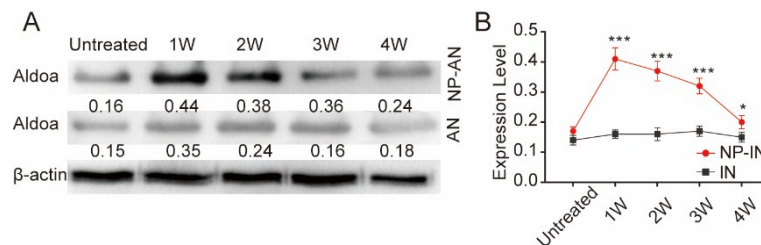

**Fig. S17** (A) The Aldoa protein expression after different treatments. Aldoa protein level increased dramatically within 3 weeks after administrated with NP-IN. (B) Quantitative results of A. Naked IN group, there was no significant change compared to the control; The NP-IN also have strong influence on Aldoa protein.

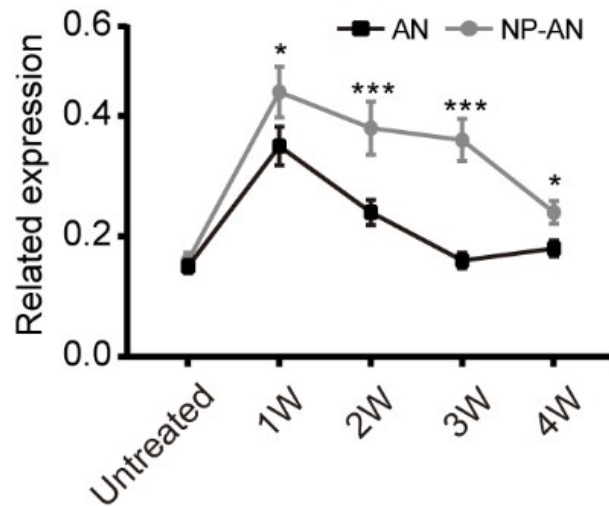

**Fig. S18** Quantitative results of NP-AN, which showed that it have strong influence on Aldoa protein than free AN.

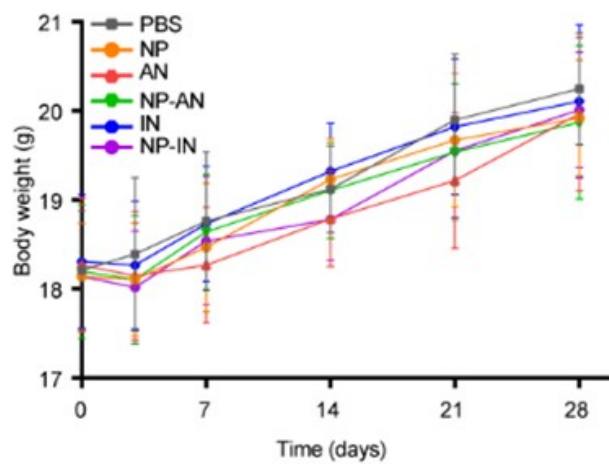

**Fig. S19** Body weight changes after administrated with PBS, blank NP, AN, IN NP-AN and NP-IN. All groups showed no significant impact on the body weight of mice. PBS, AN, NP-AN, IN and NP-IN means injected with PBS, antagomir-122, antagomir-122 loading nanoparticles, inhibitor-122 and inhibitor-122 loading nanoparticles.

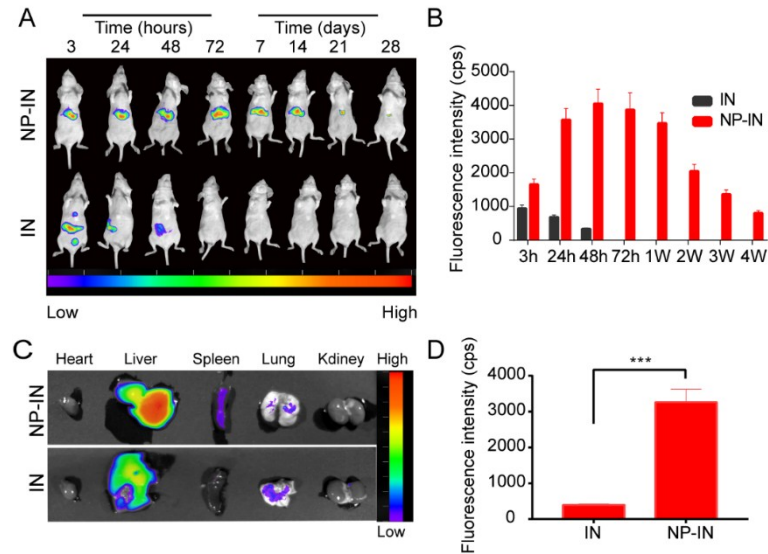

**Fig. S20** *In vivo* targeting and organ distribution of NP-IN. (A) Fluorescence images of mice after i.v. administered NP. NP-IN could retained at liver for over 28 days, as the fluorescence results showed, while the IN retained only for 1 days. (B) Quantitative results of mice after different treatments. Further confirmed the results of A. Data are presented as the means  $\pm$  SD. (n=6). (C) Ex vivo fluorescence images of organs harvested from treated mice at 72 h. NP-IN targeted at liver. Fluorescence of IN was much lower than NP-IN and even detected at lung. (D) Quantitative results of organs harvested from mice after 72 h of treatments. Further confirmed the results showed at B. Data are presented as the means  $\pm$  SD. (n=6). \* $P < 0.05$ , \*\* $P < 0.01$ , \*\*\* $P < 0.005$ . IN and NP-IN means injected with inhibitor-122 and inhibitor-122 loading nanoparticles.

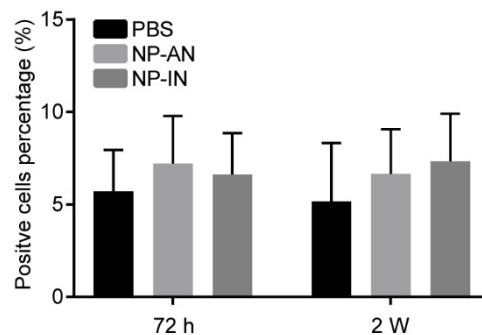

**Fig. S21** Quantification of TUNEL assay. No obvious apoptosis was observed in NP-AN and NP-IN comparing to PBS group. \* $P < 0.05$ , \*\* $P < 0.01$ , \*\*\* $P < 0.005$ .

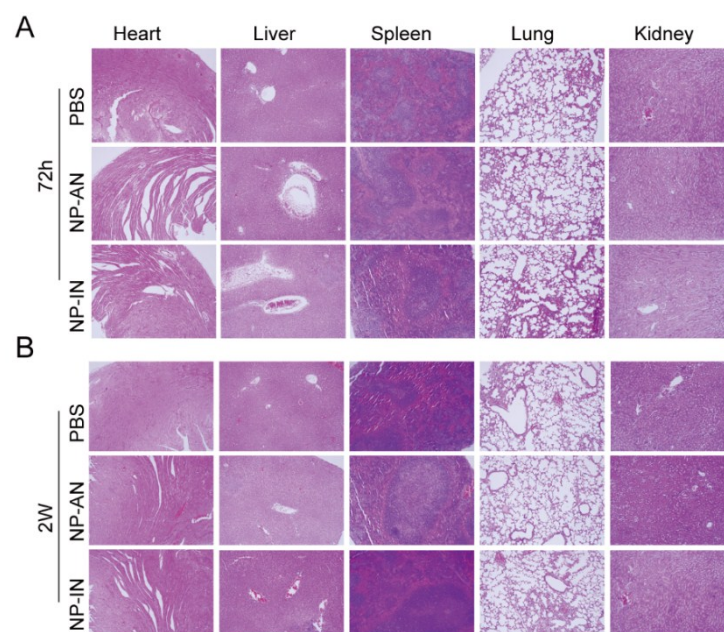

**Fig. S22** HE staining of organs obtained from treated mice at 72 hours (A) and 2 weeks (B). No apparent tissue damage could be observed in both 72 hours and 2 week HE slices.
